# Supplementary material for: FSTL1 promotes liver fibrosis by reprogramming macrophage function through modulating the intracellular function of PKM2
Source: HighWire-hosted journal article supplement (doi:10.1136/gutjnl-2021-325150), 2022-02-09
Supplement: gutjnl-2021-325150supp001_data_supplement.pdf [file gutjnl-2021-325150supp001_data_supplement.pdf]

**Supplemental table 1. Baseline characteristics of included patients.**

| Fibrosis stage    | Normal histology | Mild fibrosis (20) |           |            | Advanced fibrosis (13) |           |            |
|-------------------|------------------|--------------------|-----------|------------|------------------------|-----------|------------|
|                   |                  | HBV (1-4)          | HCV (1-2) | NASH (1-2) | HBV (5-6)              | HCV (3-4) | NASH (3-4) |
| Patients number   | 18               | HBV (8)            | HCV (9)   | NASH (3)   | HBV (4)                | HCV (8)   | NASH (1)   |
| Age (age)         | 46.6±6.2         | 54.8±9.0           | 46.8±6.6  | 52.0±2.2   | 58.3±5.4               | 56.8±9.1  | 51.0       |
| Serum TB (umol/L) | 7.9±3.0          | 16.7±5.5           | 14.5±4.5  | 13.3±4.3   | 21.0±4.7               | 18.8±3.2  | 22.4       |
| Serum ALT (U/L)   | 18.1±9.1         | 58.0±18.2          | 65.9±36.0 | 55.7±18.4  | 103.5±26.5             | 78.9±24.8 | 66.0       |
| Serum AST (U/L)   | 23.1±10.3        | 64.5±22.7          | 57.9±26.8 | 45.0±8.8   | 80.5±7.0               | 76.0±33.1 | 78.0       |
| Serum ALB (g/L)   | 41.6±1.8         | 39.1±1.9           | 40.7±2.6  | 39.2±1.4   | 35.4±2.1               | 34.8±2.1  | 35.6       |

Hepatic fibrosis stage in patients with HBV infection was defined as Ishak fibrosis score, 1-4 for Mild fibrosis, 5-6 for Advanced fibrosis.<sup>1-4</sup>

Hepatic fibrosis stage in patients with HCV infection was defined as Metavir score, 1-2 for Mild fibrosis, 3-4 for Advanced fibrosis.<sup>3-5</sup>

Hepatic fibrosis stage in patients with NASH was defined as NAFLD activity score, 1-2 for Mild fibrosis, 3-4 for Advanced fibrosis.<sup>6-8</sup>

Quantitative variables are in mean±SD. HBV, Hepatitis B virus; HCV, Hepatitis C virus; NASH, non-alcoholic steatohepatitis; ALB, albumin; ALT, alanine aminotransferase; AST, aspartate aminotransferase; TB, total bilirubin.

**Supplemental table 2. Hepatic fibrosis stage in patients with HBV infection was defined as Ishak fibrosis score.**

| Fibrosis stage (Ishaks)        | 1         | 2         | 3         | 4    | 5    | 6         |
|--------------------------------|-----------|-----------|-----------|------|------|-----------|
| Patients number                | 3         | 2         | 2         | 1    | 1    | 3         |
| Age (age)                      | 47.3±4.0  | 57.5±1.5  | 59.5±12.5 | 62   | 65   | 56±4.2    |
| Serum total bilirubin (umol/L) | 10.9±3.0  | 16.7±3.0  | 22.1±0.2  | 23.2 | 23.6 | 20.1±5.1  |
| Serum ALT (U/L)                | 44.7±19.0 | 61.0±6.0  | 62.0±11.0 | 84.0 | 121  | 97.7±28.2 |
| Serum AST (U/L)                | 56.7±32.3 | 66.5±11.5 | 68.0±13.0 | 77.0 | 82.0 | 80.0±8.0  |
| Serum albumin (g/L)            | 40.9±1.1  | 38.3±1.9  | 38.3±0.4  | 36.9 | 35.6 | 35.3±2.5  |

**Supplemental table 3. Hepatic fibrosis stage in patients with HCV infection was defined as Metavir score**

| Fibrosis stage (Metavir)       | 1         | 2         | 3         | 4         |
|--------------------------------|-----------|-----------|-----------|-----------|
| Patients number                | 6         | 3         | 3         | 5         |
| Age (age)                      | 45.8±7.3  | 51.3±2.9  | 56.7±5.4  | 56.8±10.7 |
| Serum total bilirubin (umol/L) | 12.7±4.0  | 18.2±2.9  | 19.8±2.5  | 18.1±3.4  |
| Serum ALT (U/L)                | 60.3±39.7 | 76.5±28.5 | 80.0±18.6 | 78.0±28.0 |
| Serum AST (U/L)                | 55.8±31.8 | 62.0±10.0 | 74.0±37.0 | 77.2±30.4 |
| Serum albumin (g/L)            | 41.6±2.6  | 39.1±1.4  | 35.7±1.7  | 34.2±2.1  |

**Supplemental table 4. Hepatic fibrosis stage in patients with NASH was defined as NAFLD activity score**

| Fibrosis stage (NAS)           | 1         | 2    | 3 | 4    |
|--------------------------------|-----------|------|---|------|
| Patients number                | 2         | 1    | 0 | 1    |
| Age (age)                      | 51.0±2.0  | 54   | — | 51   |
| Serum total bilirubin (umol/L) | 12.3±5.0  | 15.5 | — | 22.4 |
| Serum ALT (U/L)                | 53.0±22.0 | 61   | — | 66   |
| Serum AST (U/L)                | 46.5±10.5 | 42   | — | 78   |
| Serum albumin (g/L)            | 40.1±0.6  | 37.3 | — | 35.6 |

Supplemental table 5. Primers for mice genotyping

| Primer name        | Target     | No      | Lot | Direction | Sequence                    | wt     | ko     | Blast | PRI | Using       | Method | Cite |
|--------------------|------------|---------|-----|-----------|-----------------------------|--------|--------|-------|-----|-------------|--------|------|
| TL-CRE-G-JCYK-K    | Lyz2Mut    | C66     | 1   | Reverse   | 5'-CCCAGAAATGCCAGATTACG-3'  | -      | 750-bp | N     |     | Genomic DNA | Age    | JYCK |
|                    |            | C67     |     | Forward   | 5'-CTTGGGCTGCCAGAATTTCTC-3' |        |        |       |     | Tail        |        |      |
| TL-CRE-G-JCYK-W    | Lyz2WT     | C67     | 1   | Reverse   | 5'-CTTGGGCTGCCAGAATTTCTC-3' | 350-bp | -      | Y     |     | Genomic DNA | Age    | JYCK |
|                    |            | C68     |     | Forward   | 5'-TTACAGTCGGCCAGGCTGAC-3'  |        |        |       |     | Tail        |        |      |
| NM-FSTL1-G-JYCK-FL | FSTL1-FLOX | FI34F-1 | 1   | Reverse   | 5'-ACATGGTGACCATCCTTCGG-3'  | 547    | 734    |       |     | Genomic DNA | Age    | JYCK |
|                    |            | FI34R-1 |     | Forward   | 5'TTCTAGGTTCCCTCCTAAAAC-3'  |        |        |       |     | Tail        |        |      |

**Supplemental table 6. Primer sequences for the amplification.**

| Gene               | Forward Primer (5' → 3') | Reverse Primer (5' → 3') |
|--------------------|--------------------------|--------------------------|
| FSTL1(Human)       | GCCATGACCTGTGACGGAAA     | CAGCGCTGAAGTGGAGAAGA     |
| Collagen I (Human) | GAGGGCCAAGACGAAGACATC    | CAGATCACGTCATCGCACAAAC   |
| TIMP-1 (Human)     | CTTCTGCAATTCCGACCTCGT    | CCCTAAGGCTTGGAACCCTTT    |
| β-actin(Human)     | CATGTACGTTGCTATCCAGGC    | CTCCTTAATGTCACGCACGAT    |
| α-SMA(Mouse)       | GTCCCAGACATCAGGGAGTAA    | TCGGATACTTCAGCGTCAGGA    |
| Collagen-I (Mouse) | GCTCCTCTTAGGGGCCACT      | CCACGTCTCACCATTGGGG      |
| TIMP-1 (Mouse)     | GCAACTCGGACCTGGTCATAA    | CGGCCCGTGATGAGAAACT      |
| β-actin (Mouse)    | GGCTGTATTCCCCTCCATCG     | CCAGTTGGTAACAATGCCATGT   |
| TNF-α (Mouse)      | GCCAGAGGGCTGATTAGAGA     | CAGCCTCTTCTCCTTCCTGAT    |
| IL-1β (Mouse)      | CCAGGATGAGGACCCAAGCA     | TCCCGACCATTGCTGTTTCC     |
| IL-10 (Mouse)      | ACAGGGAAGAAATCGATGACA    | TGGGGGAGAACCTGAAGAC      |
| iNOS (Mouse)       | AATCTTGGAGCGAGTTGTGG     | CAGGAAGTAGGTGAGGGCTTG    |
| Argines1 (Mouse)   | CTCCAAGCCAAAGTCCTTAGAG   | AGGAGCTGTCATTAGGGACATC   |
| TGF-β (Mouse)      | CGCCATCTATGAGAAAACCAA    | GAGTTCCACATGTTGCTCCA     |

## References

1. Sun, Y., et al., *Persistent Low Level of Hepatitis B Virus Promotes Fibrosis Progression During Therapy*. Clin Gastroenterol Hepatol, 2020. **18**(11): p. 2582-2591 e6.
2. Sterling, R.K., et al., *Evaluating Noninvasive Markers to Identify Advanced Fibrosis by Liver Biopsy in HBV/HIV Co-infected Adults*. Hepatology, 2020. **71**(2): p. 411-421.
3. Patin, E., et al., *Genome-wide association study identifies variants associated with progression of liver fibrosis from HCV infection*. Gastroenterology, 2012. **143**(5): p. 1244-1252 e12.
4. Cacoub, P., et al., *Comparison of non-invasive liver fibrosis biomarkers in HIV/HCV co-infected patients: the fibrovic study--ANRS HC02*. J Hepatol, 2008. **48**(5): p. 765-73.
5. Konerman, M.A., et al., *Fibrosis progression in human immunodeficiency virus/hepatitis C virus coinfecting adults: prospective analysis of 435 liver biopsy pairs*. Hepatology, 2014. **59**(3): p. 767-75.
6. Kleiner, D.E., et al., *Design and validation of a histological scoring system for nonalcoholic fatty liver disease*. Hepatology, 2005. **41**(6): p. 1313-21.
7. Newsome, P.N., et al., *FibroScan-AST (FAST) score for the non-invasive identification of patients with non-alcoholic steatohepatitis with significant activity and fibrosis: a prospective derivation and global validation study*. Lancet Gastroenterol Hepatol, 2020. **5**(4): p. 362-373.
8. Harrison, S.A., et al., *NGM282 Improves Liver Fibrosis and Histology in 12 Weeks in Patients With Nonalcoholic Steatohepatitis*.

Hepatology, 2020. **71**(4): p. 1198-1212.
