# Supplementary material for: FSTL1 promotes liver fibrosis by reprogramming macrophage function through modulating the intracellular function of PKM2
Source: HighWire-hosted journal article supplement (doi:10.1136/gutjnl-2021-325150), 2022-02-09
Supplement: gutjnl-2021-325150supp003_data_supplement.pdf [file gutjnl-2021-325150supp003_data_supplement.pdf]

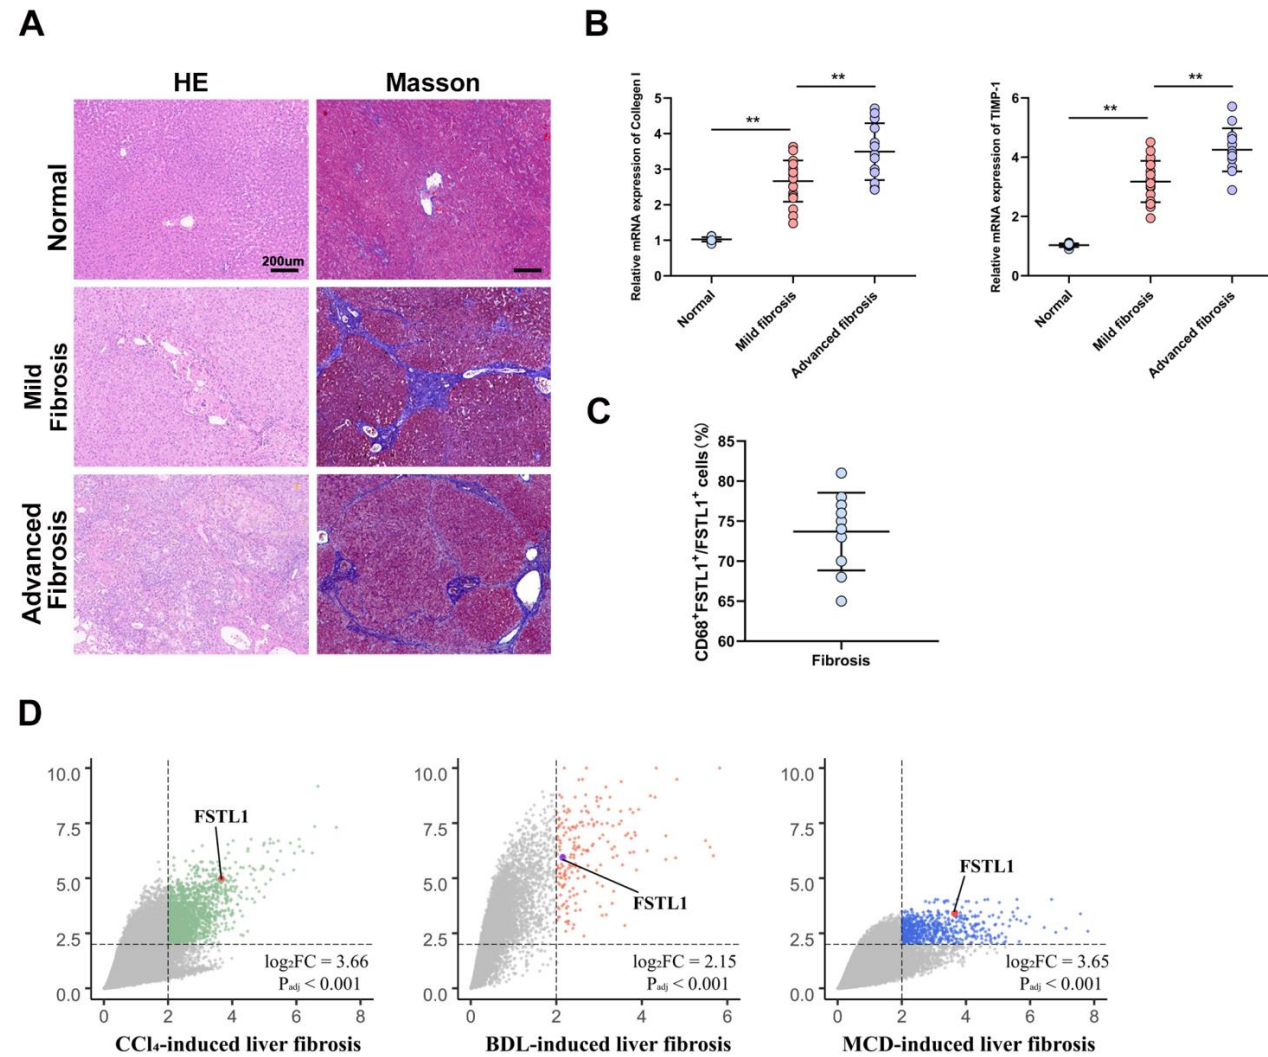

Supplemental Figure 1

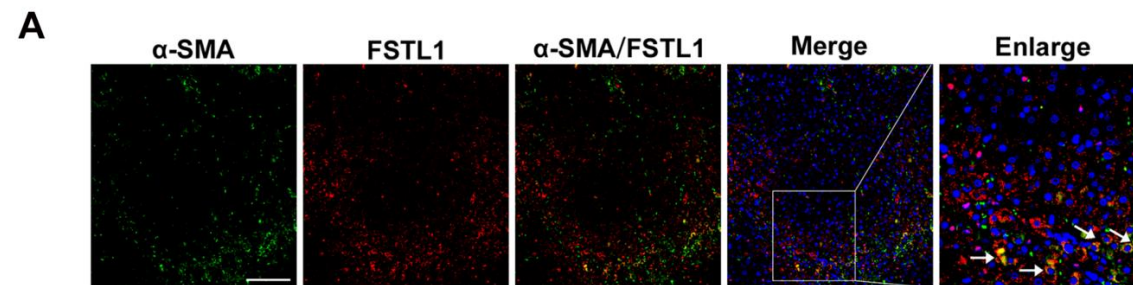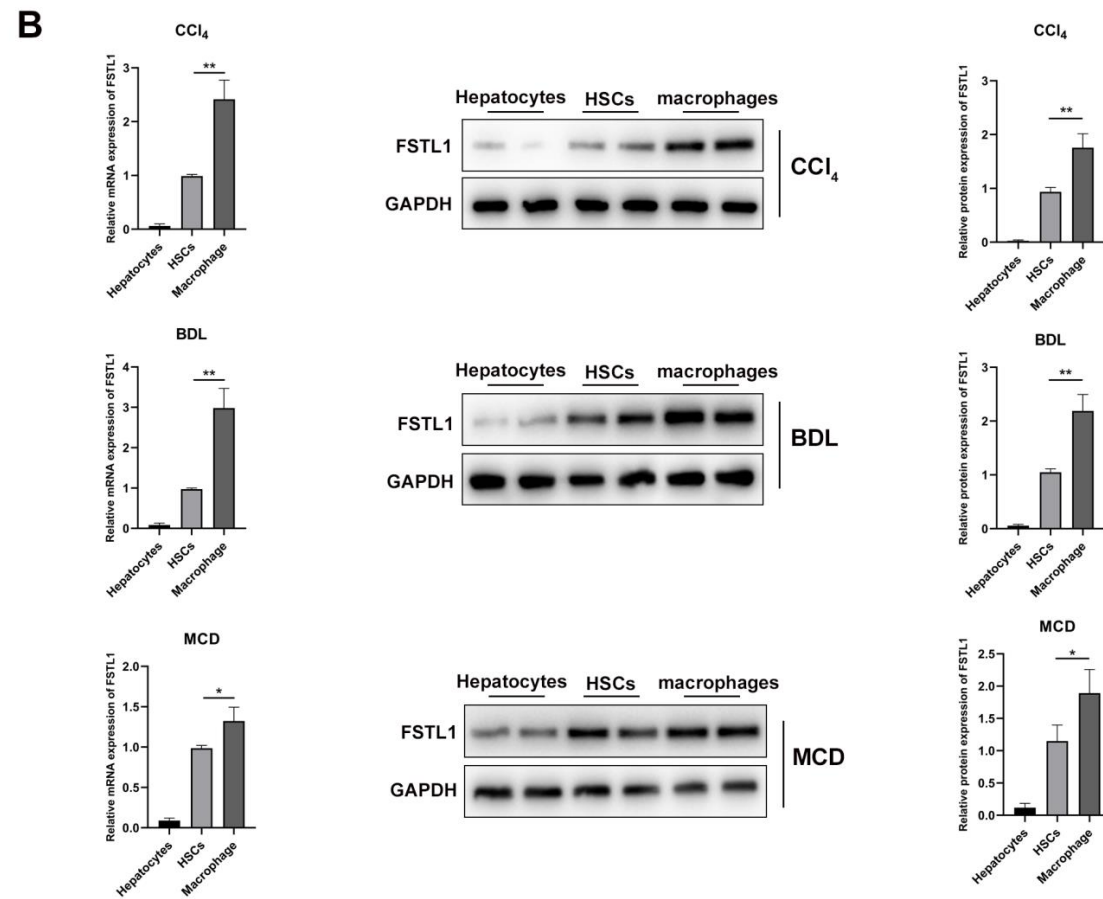

Supplemental Figure 2

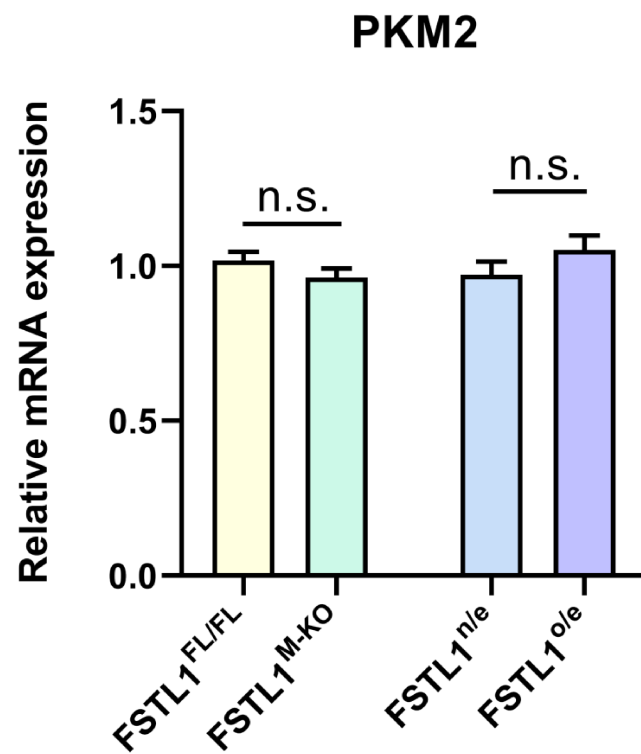

Supplemental Figure 3

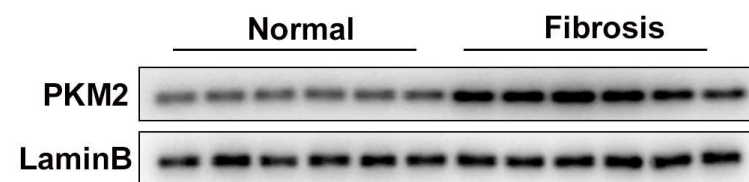

Supplemental Figure 4

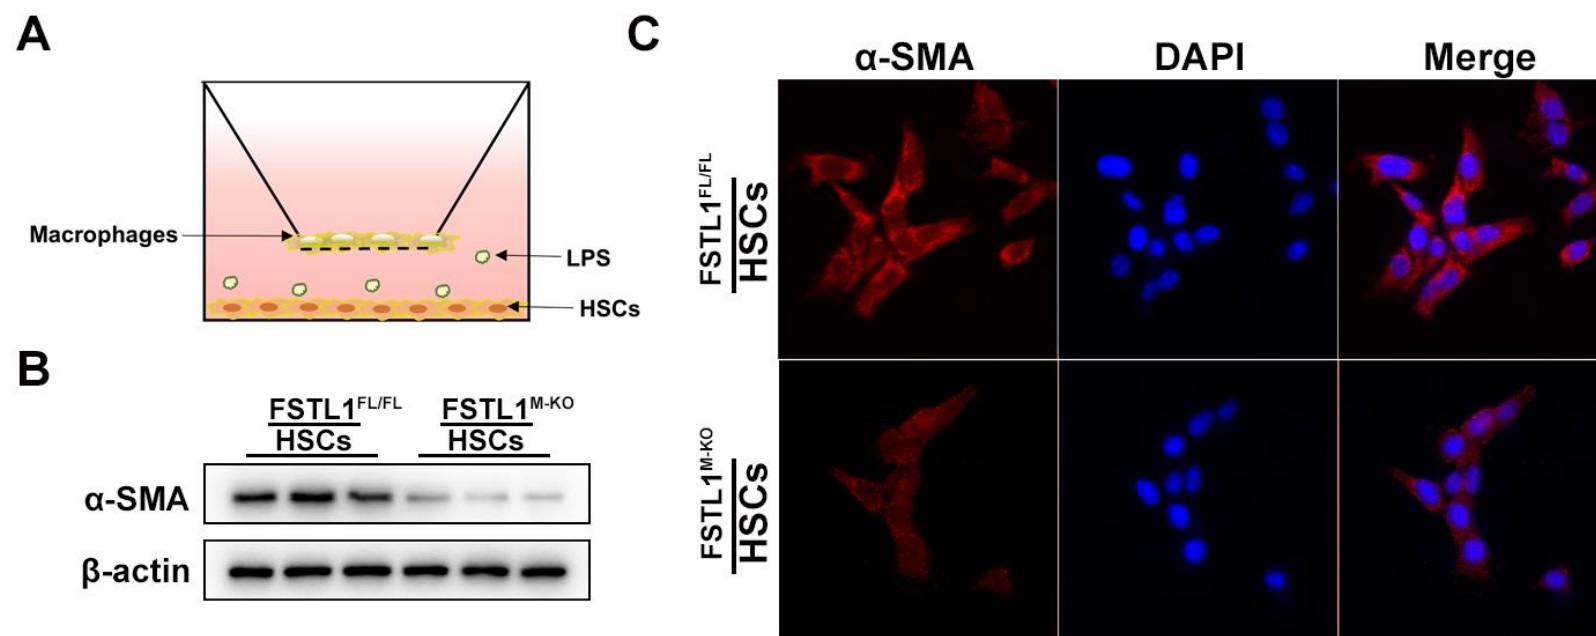

Supplemental Figure 5

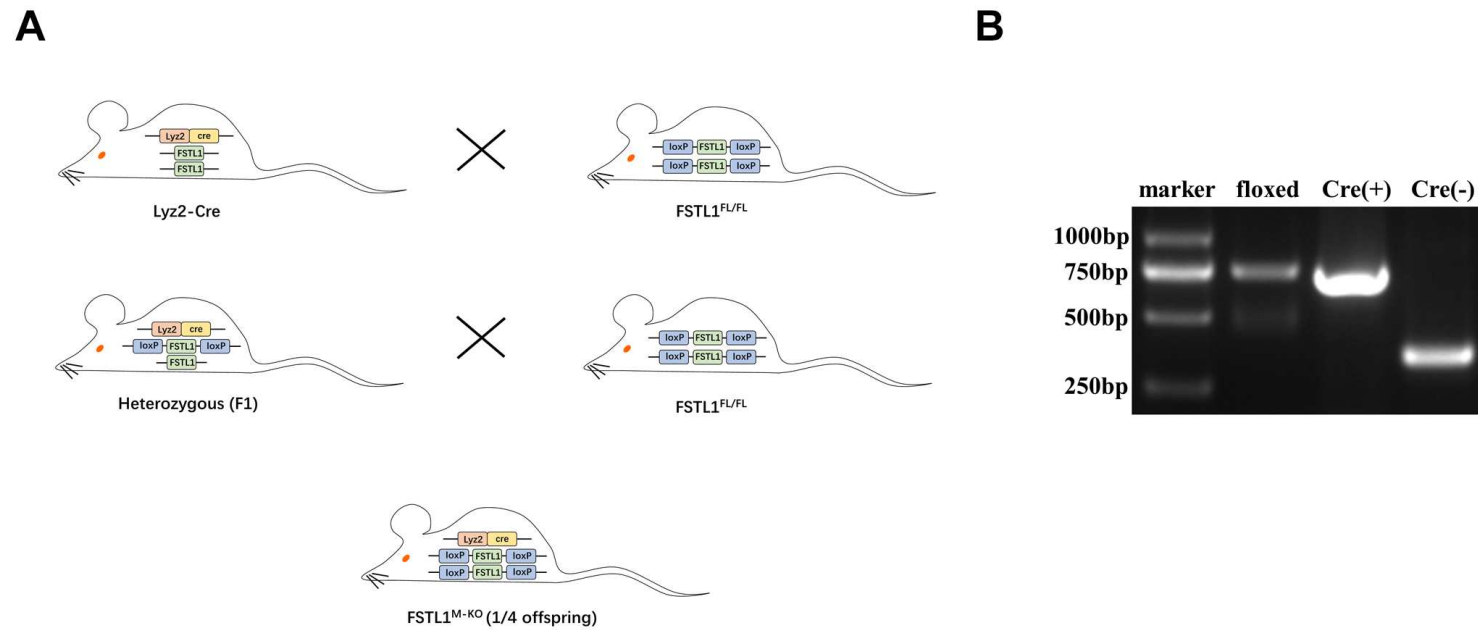

Supplemental Figure 6

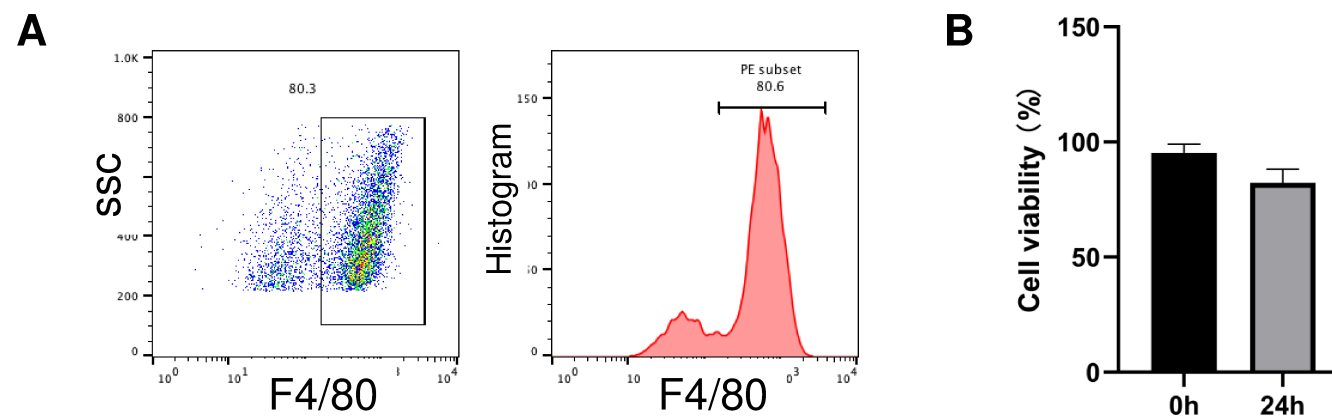

Supplemental Figure 7

Fig.1C

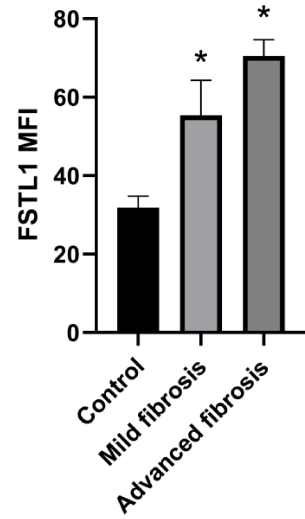

Fig.1H

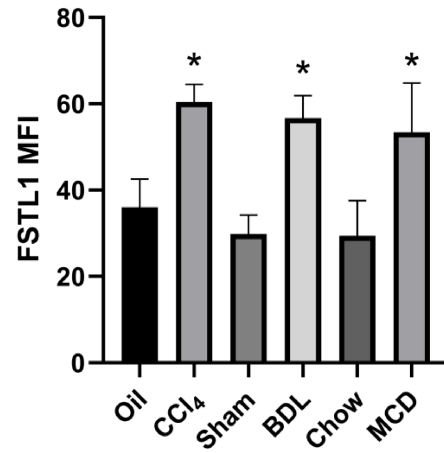

Fig.4A

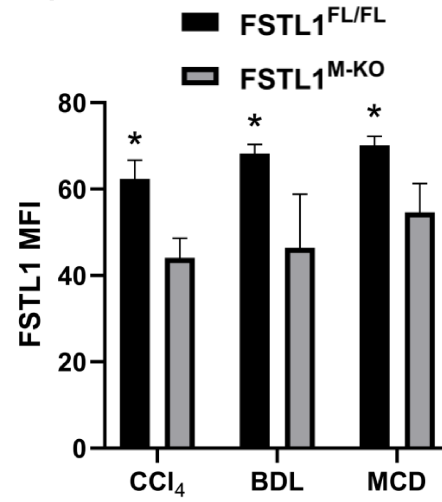

Fig.4D

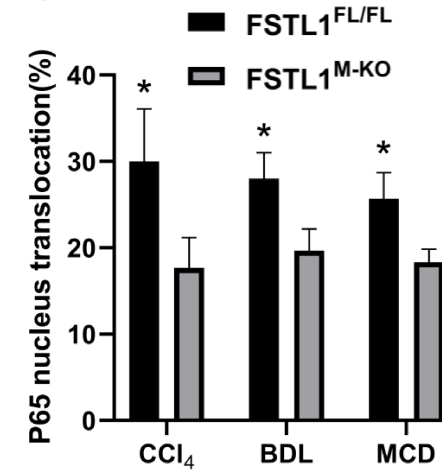

Fig.6A

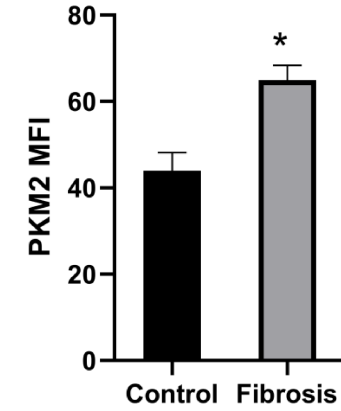

Fig.6B

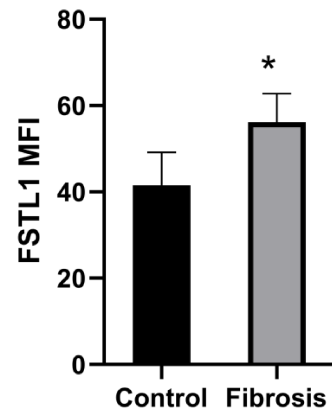

Fig.6C

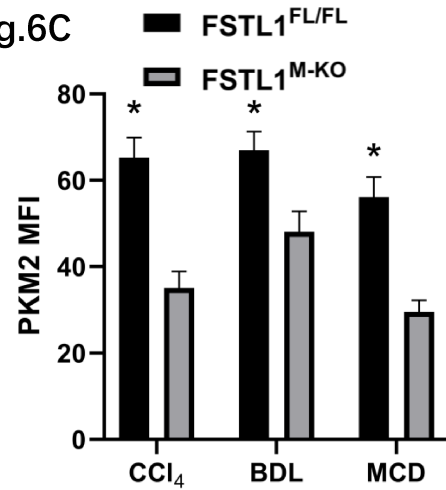

Fig.7C

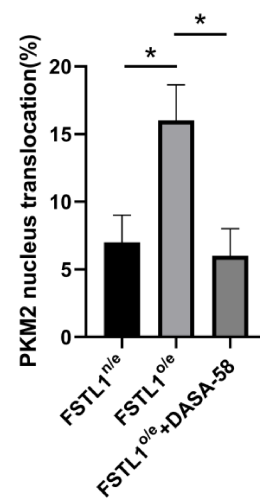

Fig.7F

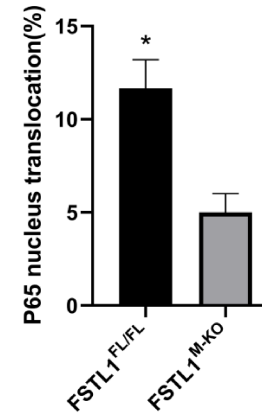

Fig.7G

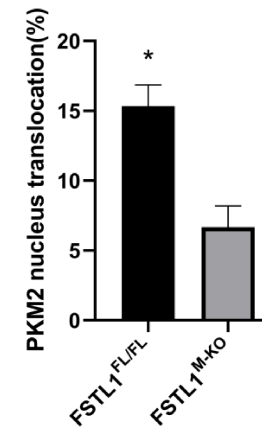

Fig.8D

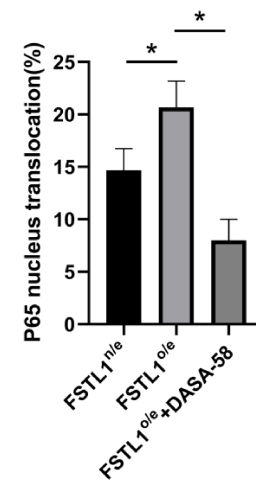

Supplemental Figure 8
